# Supplementary material
Source: publisher site journal article supplement (https://www.dovepress.com/article/243212)

**Supplementary Figure legend**

**Supplementary Figure 1.** The protein level of glycolytic enzymes in sinomenine-treated HCC827 cells. HCC827 cells were treated with 100 μM sinomenine or DMSO control, the whole-cell lysate was collected and subjected to IB analysis.


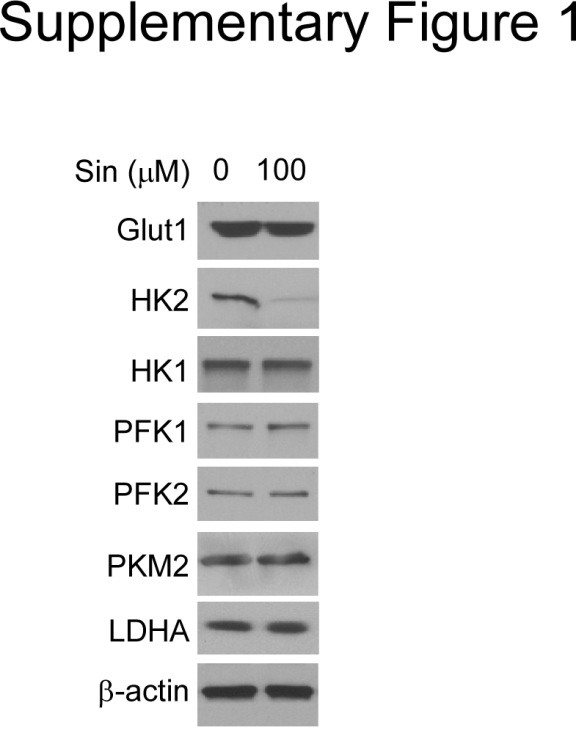

Supplement: Supplementary file 1 [file get_supplementary_file.php]
